# Supplementary material for: Monitoring the BTEX Volatiles during 3D Printing with Acrylonitrile Butadiene Styrene (ABS) Using Electronic Nose and Proton Transfer Reaction Mass Spectrometry
Source: PubMed Central journal article supplement (PMC7582819; doi:10.3390/s20195531), 2020-09-27
Supplement: sensors-20-05531-s001.pdf [file sensors-20-05531-s001.pdf]

Supplementary material

# Monitoring the BTEX Volatiles During 3d Printing With Acrylonitrile Butadiene Styrene (ABS) Using Electronic Nose and Proton Transfer Reaction Mass Spectrometry

Wojciech Wojnowski 1,\* , Kaja Kalinowska 1,\* , Jacek Gębicki 2 and Bożena Zabiegała 1

<sup>1</sup> Department of Analytical Chemistry, Faculty of Chemistry, Gdańsk University of Technology, 11/12 Gabriela Narutowicza Street, Gdańsk, 80-233, Poland; bozena.zabiegala@pg.edu.pl

<sup>2</sup> Department of Process Engineering and Chemical Technology, Faculty of Chemistry, Gdańsk University of Technology, 11/12 Gabriela Narutowicza Street, Gdańsk, 80-233, Poland; jacek.gebicki@pg.edu.pl

\* Correspondence: wojciech.wojnowski@pg.edu.pl (W.W.); kaja.kalinowska@pg.edu.pl (K.K.)

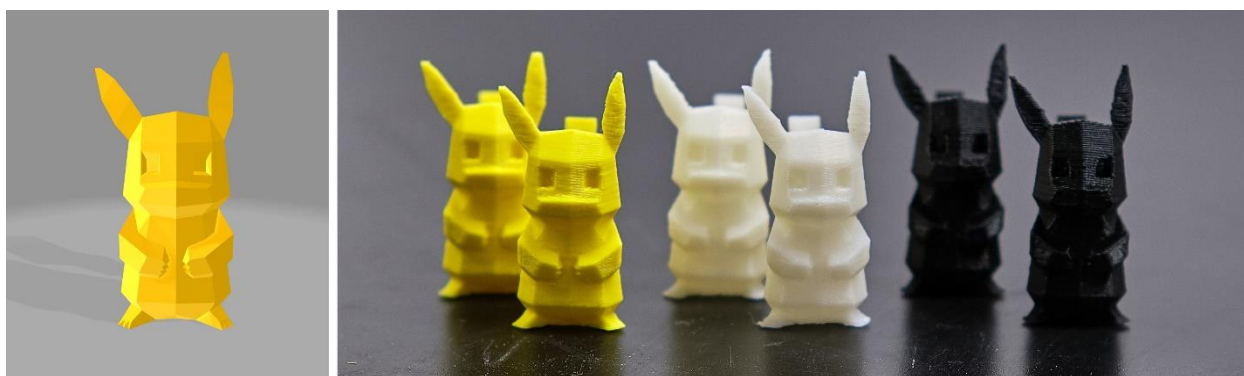

**Figure S1.** A 3D model of a low-poly Pikachu ([thingiverse.com/thing:376601](https://thingiverse.com/thing:376601), left) and figurines printed out of yellow, natural and black ABS filament (right).

**Table S1.** PTR-MS fragmentation pattern of selected compounds at E/N of 120 Td.

| Benzene         |              | Toluene         |              | Styrene         |              | Ethylbenzene    |              |
|-----------------|--------------|-----------------|--------------|-----------------|--------------|-----------------|--------------|
| MH <sup>+</sup> | ratio        | MH <sup>+</sup> | ratio        | MH <sup>+</sup> | ratio        | MH <sup>+</sup> | ratio        |
| 78.04           | 0.022        | 53.04           | 0.002        | 104.07          | 0.024        | 79.06           | 0.615        |
| <b>79.06</b>    | <b>0.917</b> | 91.07           | 0.019        | <b>105.09</b>   | <b>0.905</b> | 80.08           | 0.048        |
| 80.05           | 0.062        | 92.07           | 0.020        | 106.08          | 0.071        | 91.07           | 0.027        |
|                 |              | <b>93.09</b>    | <b>0.891</b> |                 |              | <b>107.12</b>   | <b>0.283</b> |
|                 |              | 94.08           | 0.062        |                 |              | 108.11          | 0.026        |
|                 |              | 95.06           | 0.006        |                 |              |                 |              |

**Table S2.** Sensors used in the electronic nose's replaceable sensor modules and the corresponding ReliefF score for classification based on the exceedance of benzene TLV.

| Sensor       | Target analyte        | Application                                                                                         | LOD [ppb] | ReliefF score | Spearman corr. with benzene conc. | Main cross-sensitivity                                                |
|--------------|-----------------------|-----------------------------------------------------------------------------------------------------|-----------|---------------|-----------------------------------|-----------------------------------------------------------------------|
| SPEC 110-507 | NO <sub>2</sub>       | Air quality monitoring, industrial safety, air purification control                                 | <20       | 0.048         | 0.34                              | Not provided                                                          |
| SPEC 110-601 | SO <sub>2</sub>       | Air quality monitoring, industrial safety, air purification control                                 | <20       | 0.157         | 0.86                              | Not provided                                                          |
| SPEC 110-303 | H <sub>2</sub> S      | Industrial safety<br>Monitoring, personal safety monitor, indoor and outdoor air quality, halitosis | <1000     | 0.094         | 0.74                              | NO <sub>2</sub> , SO <sub>2</sub> , Cl <sub>2</sub>                   |
| SPEC 110-102 | CO                    | Residential monitoring, ventilation control, indoor and outdoor air quality                         | 500       | 0.091         | 0.80                              | H <sub>2</sub> , isopropyl alcohol                                    |
| SPEC 110-901 | Respiratory irritants | HVAC ventilation control, indoor air quality, telemedicine, air purifier controls                   | <1000     | 0.199         | 0.89                              | H <sub>2</sub> S, NO <sub>2</sub> , SO <sub>2</sub> , Cl <sub>2</sub> |
| SPEC 110-205 | EtOH                  | Breathalyzers                                                                                       | <1000     | 0.034         | 0.54                              | H <sub>2</sub> S, CO, NO                                              |
| CITY NH3 100 | NH <sub>3</sub>       | Industrial safety                                                                                   | <1000     | 0.116         | 0.79                              | H <sub>2</sub> S                                                      |

**Table S3.** Confusion matrices for different training/testing groups and two different classification models. Results shown as percentage of actual.

| Training / testing | Actual    | Predicted |           |           |           |
|--------------------|-----------|-----------|-----------|-----------|-----------|
|                    |           | SVM       |           | SGD       |           |
|                    |           | Above TLV | Below TLV | Above TLV | Below TLV |
| A*                 | Above TLV | 92.7%     | 0.0%      | 92.7%     | 0.0%      |
|                    | Below TLV | 7.3%      | 100%      | 7.3%      | 100%      |
| B**                | Above TLV | 98.2%     | 7.7%      | 94.9%     | 9.1%      |
|                    | Below TLV | 1.8%      | 92.3%     | 5.1%      | 90.9%     |
| C***               | Above TLV | 75.0%     | 21.9%     | 100%      | 30.8%     |
|                    | Below TLV | 25.0%     | 78.1%     | 0.0%      | 69.2%     |

\* training: black ABS, yellow ABS; testing: natural ABS.

\*\* training: natural ABS, yellow ABS; testing: black ABS.

\*\*\* training: natural ABS, black ABS; testing: yellow ABS.
